# Supplementary material
Source: ML conference proceedings conference paper supplement (https://aclanthology.org/2026.semeval-1.290)

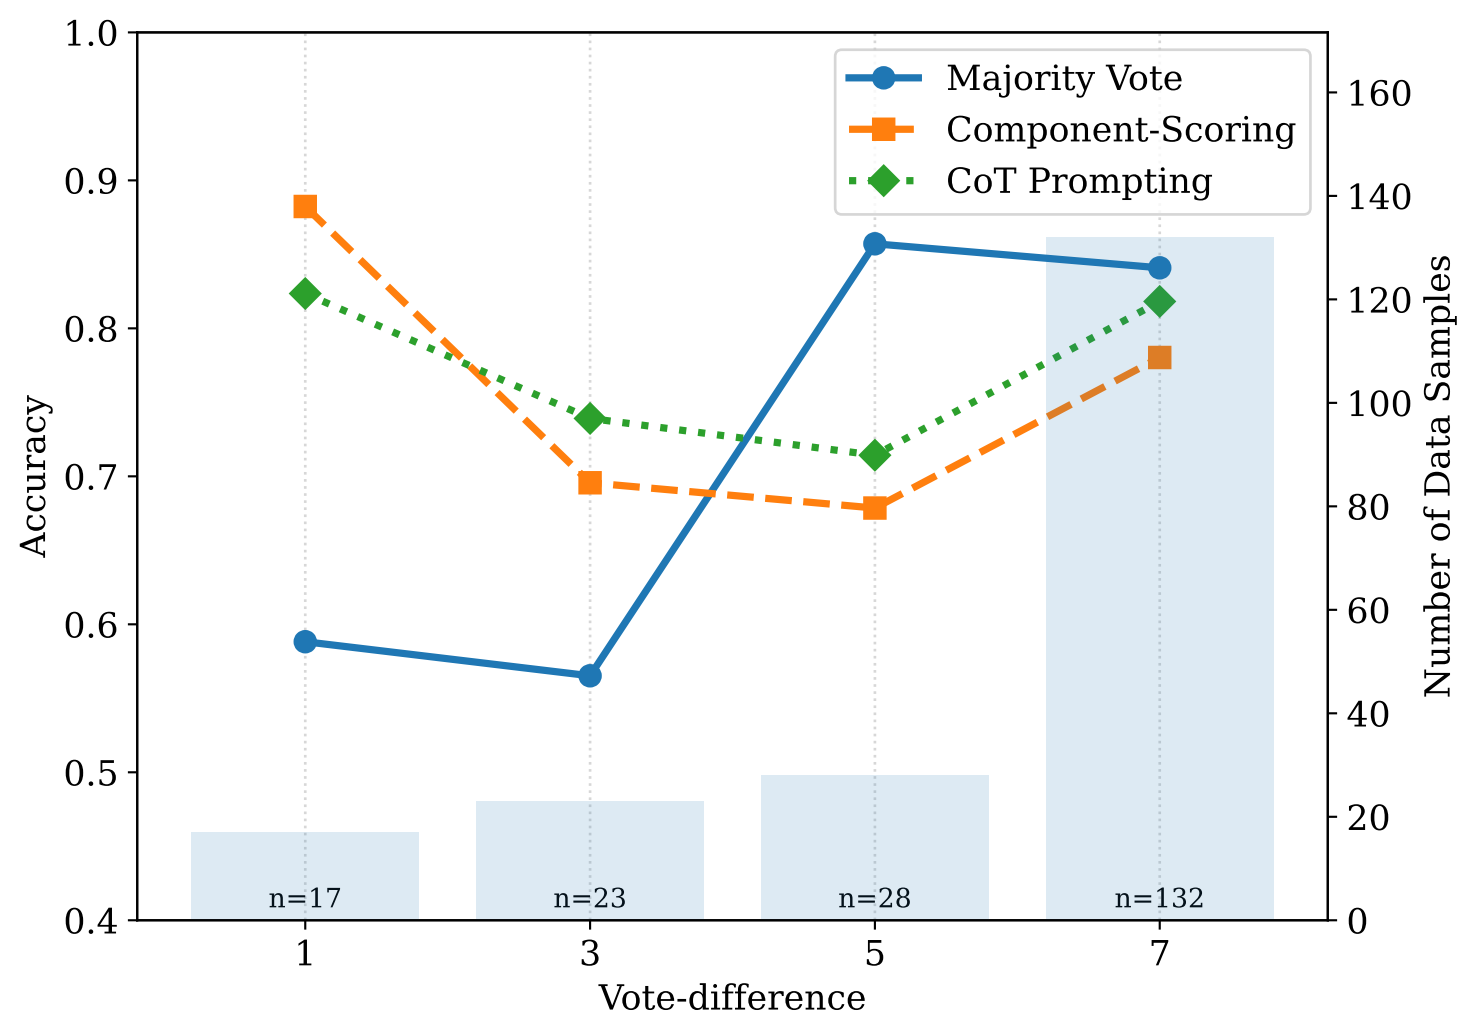

Supplement: SupplementaryMaterial [file acc_comparison.pdf › fig/acc_comparison.pdf]
